# Supplementary material
Source: publisher figshare collection journal article supplement (https://gsapubs.figshare.com/ndownloader/files/24850532)
Supplement: Supplementary file 1 [file 24850532]

## Sheet: Sheet1
Supplemental Material for Ashworth, A.C., Thackray, G.D., and Gavin, D.G., 2020, Climate of the Last Glacial Maximum on the western Olympic Peninsula
based on insect paleoecology, palynology, and glacial geology, in Waitt, R.B., Thackray, G.D., and Gillespie, A.R., eds., Untangling the Quaternary Period:
A Legacy of Stephen C. Porter: Geological Society of America Special Paper 548, https://doi.org/10.1130/2020.2548(06).
S2B. Kalaloch K1
Taxa	H	P	LE	RE	Other	MNI
Carabidae
Carabidae gen sp.					fE	1
Hydrophilidae
Helophorus auricollis			1			1
Staphylinidae
Arpedium sp.			3	1		3
Tachyporinae gen. sp.				1		1
Staphylininae gen. sp.			1	1		1
Scarabaeidae
Aphodius sp.			1			1
Byrrhidae
Byrrhidae gen. sp.			1	3		3
Chrysomelidae
Neocrepidodera robusta			1	1		1
Chrysomelidae gen. sp.			4	4		4
Brentidae
Apion spp.				2		2
Curculionidae
Sitona sp.				1		1
Curculionidae gen. sp.				1		1
Total Individuals						20
H=head(s); P=pronotum(a); LE= left elytron (a); RE=right elytron (a);S=sternite (s);
E=elyton indeterminate; f=fragment; MNI=minimum number of individuals
